# Supplementary material for: Simulated microgravity with floating environment promotes migration of non-small cell lung cancers
Source: PubMed Central journal article supplement (PMC6787256; doi:10.1038/s41598-019-50736-6), 2019-10-10
Supplement: 41598_2019_50736_MOESM1_ESM.pdf [file 41598_2019_50736_MOESM1_ESM.pdf]

## Supplementary Information for

# **Simulated microgravity with floating environment promotes migration of non-small cell lung cancers**

Chi Bum Ahn <sup>1,\*</sup>, Ji-Hyun Lee <sup>1,\*</sup>, Dae Geun Han <sup>2</sup>, Hyun-Wook Kang <sup>3</sup>, Sung-Ho Lee <sup>4</sup>, Jae-Ik Lee <sup>5</sup>, Kuk Hui Son <sup>5,†</sup>, Jin Woo Lee <sup>1,2,†</sup>

<sup>1</sup> Department of Molecular Medicine, College of Medicine, Gachon University, Incheon, Republic of Korea

<sup>2</sup> Department of Health Sciences and Technology, GAIHST, Gachon University, Incheon, Republic of Korea

<sup>3</sup> Department of Biomedical Engineering, School of Life Sciences, Ulsan National Institute of Science and Technology, Ulsan, Republic of Korea

<sup>4</sup> Department of Thoracic and Cardiovascular Surgery, Korea University Medical College, Korea University, Seoul, Republic of Korea

<sup>5</sup> Department of Thoracic and Cardiovascular Surgery, Gachon University Gil Medical Center, School of Medicine, Gachon University, Incheon, Republic of Korea

\* These authors contributed equally to this work.

† Corresponding authors.

Please address all correspondence to Professor Kuk Hui Son and Jin Woo Lee.

Supplementary figure

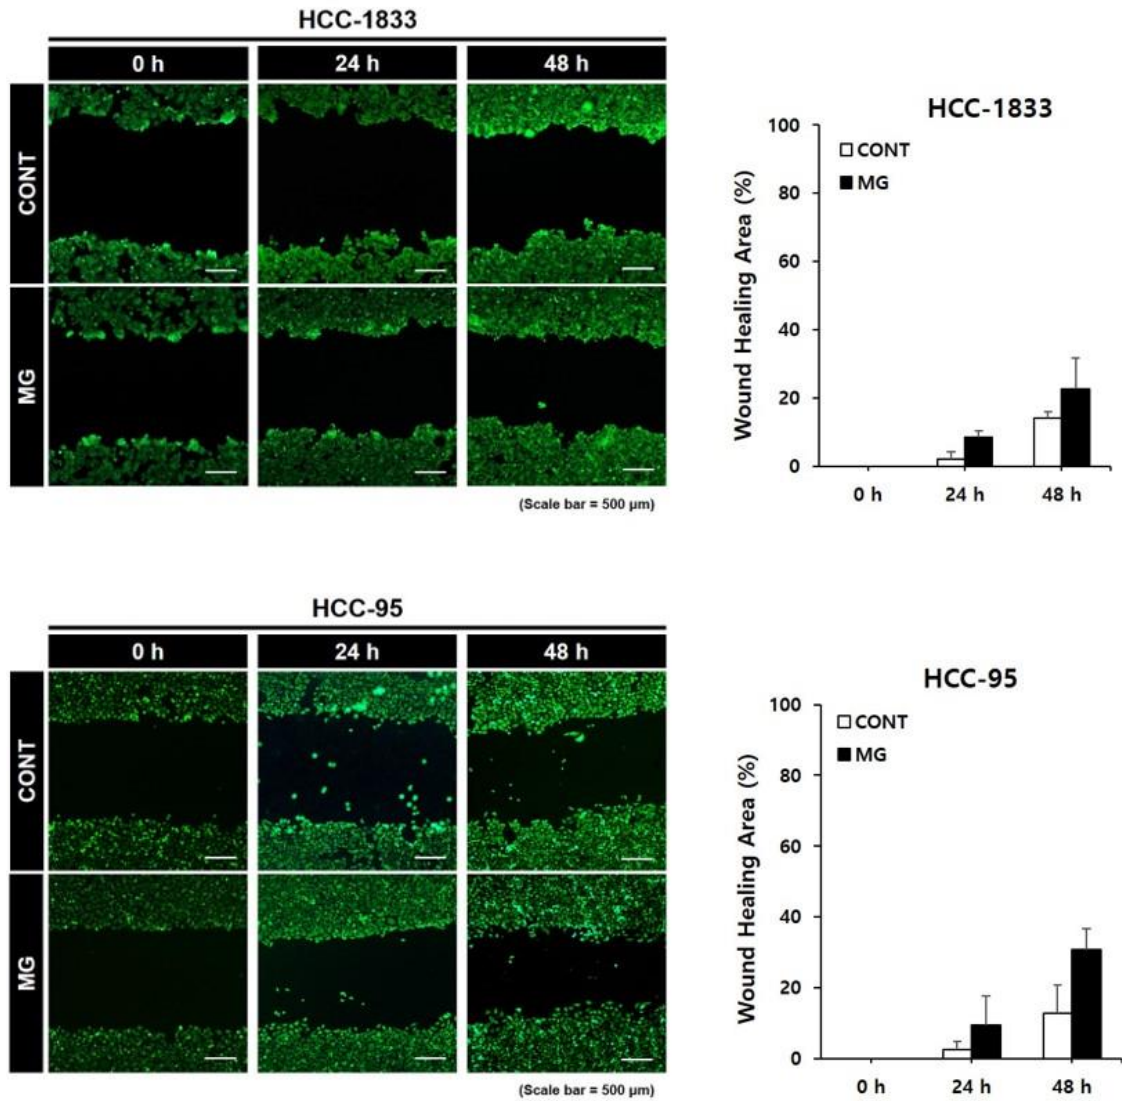

**Supplementary figure 1.** Wound healing analysis of HCC-1833 (adenocarcinoma) and HCC-95 (squamous cell carcinoma) at a low cell proliferation condition (1% FBS condition) on CONT and MG (\*\* $p < 0.01$ ).

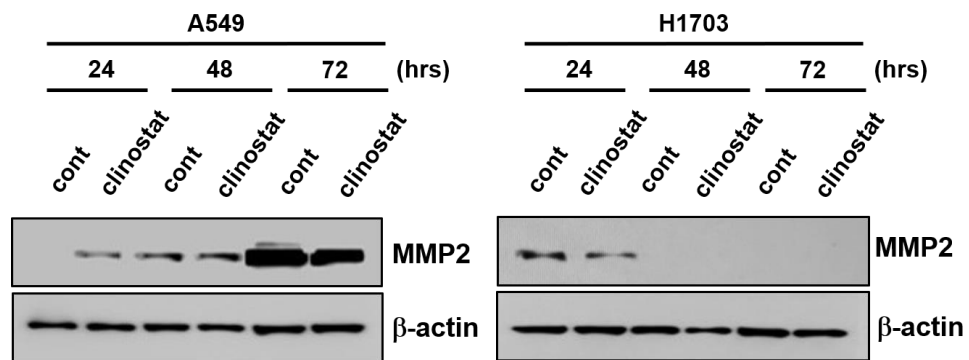

**Supplementary figure 2.** Long term comparison of MMP-2 protein expression between CONT and MG in A549/H1703 cells.

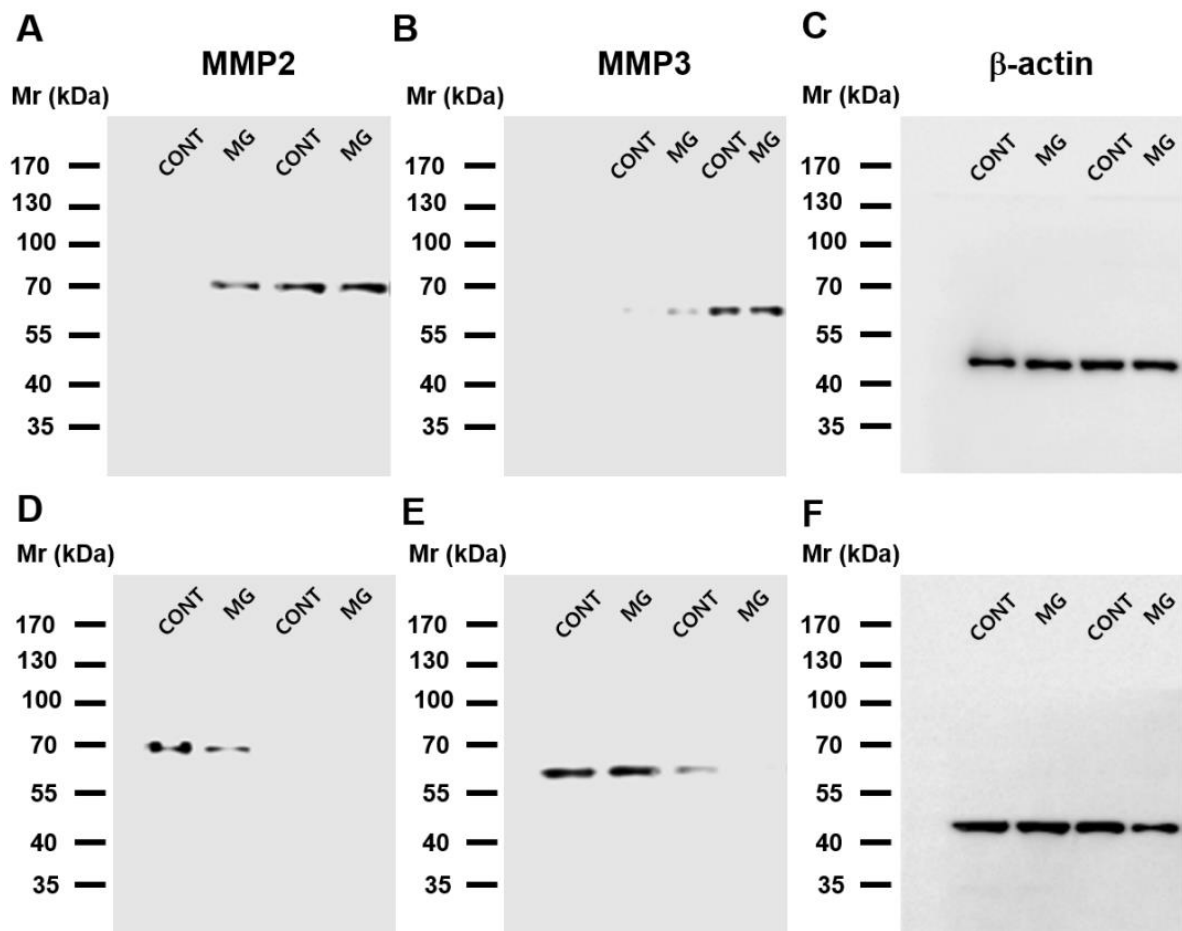

**Supplementary figure 3.** Original gel images by western blotting. MMP-2 (A), MMP-3 (B) and  $\beta$ -actin (C) protein expressions between CONT and MG in A549 cells. . MMP-2 (D), MMP-3 (E) and  $\beta$ -actin (F) protein expressions between CONT and MG in H1703 cells.
